# Supplementary material for: Independent Expansions Define Giant Hornet Genomes
Source: Research Square preprint supplement (doi:10.21203/rs.3.rs-7382414/v1), 2025-09-02
Supplement: Supplementary file 1 [file bad6b853e809b8e656e7f6fe.docx]

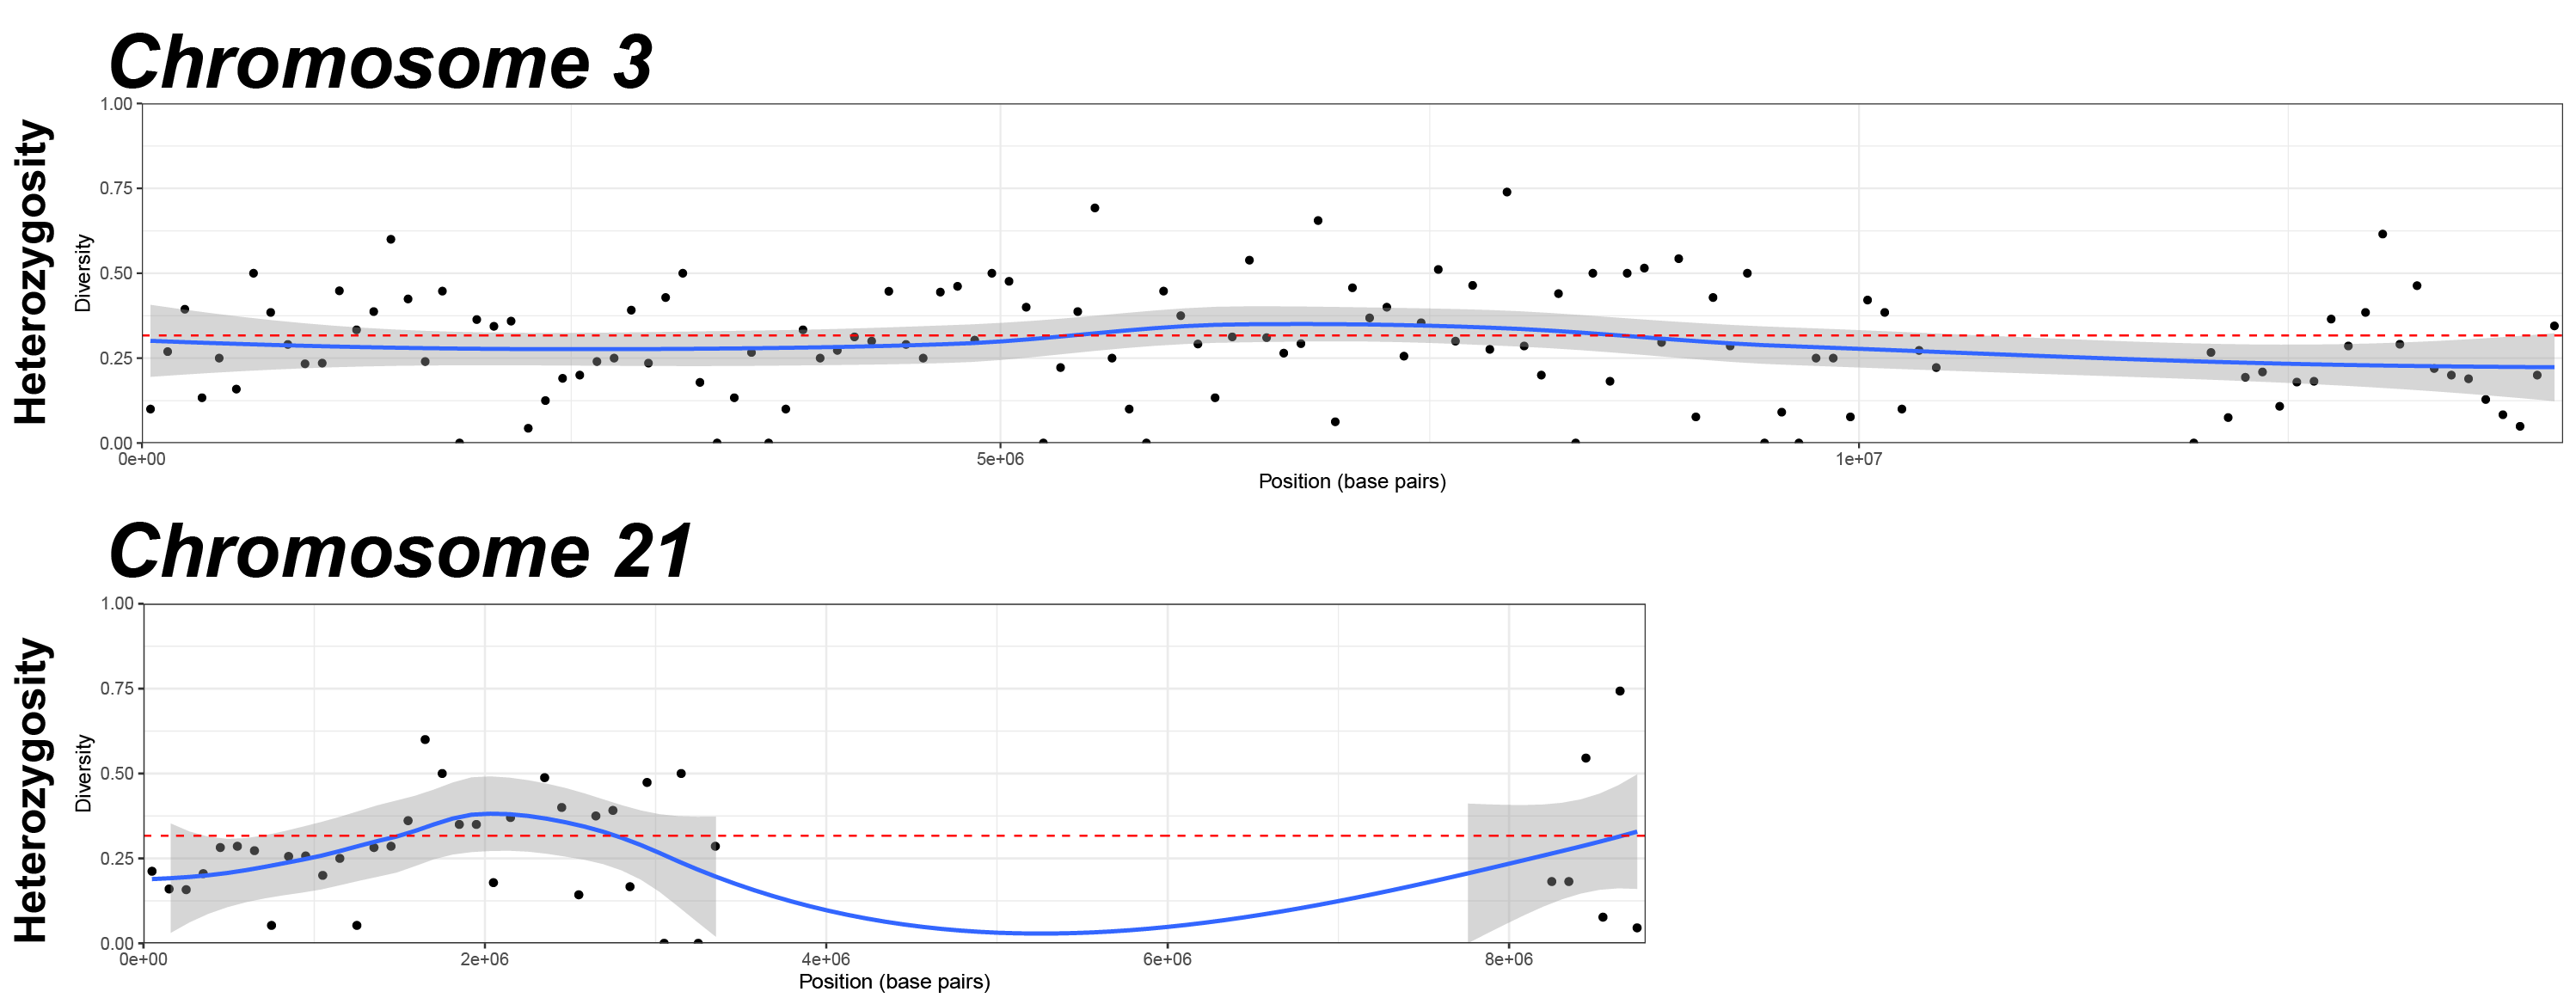

**Supplementary Figure S1**. Heterozygosity of Vespa mandarinia alleles along chromosomes 3 and 21. Dots represent the number of heterozygous variants in Canadian V. mandarinia divided by all V. mandarinia variants, computed in 100,000 base pair windows; blue line and shaded region represent LOESS regression; red dashed line denotes genome-wide average variation across windows.

Supplementary table S1: Copy number of transposable elements identified in the *Vespa* and *Vespula*.

| **Family Name** | ***Vespa mandarinia***  **Washington** | ***Vespa mandarinia***  **Canada** | ***Vespa crabro*** | ***Vespula* pensylvanica** |
| --- | --- | --- | --- | --- |
| SINEs | 17,085 | 16,956 | 16,352 | 14,921 |
| LINE/L1 | 8,748 | 8,788 | 8,014 | 6,768 |
| LINE/L2 | 109 | 95 | 105 | 57 |
| LINE/R1 | 6,157 | 6,524 | 7,609 | 4,419 |
| LINE/RTE | 154 | 165 | 335 | 34 |
| LTR/BEL/Pao | 140 | 166 | 200 | 89 |
| LTR/Ty1/Copia | 309 | 303 | 304 | 301 |
| LTR/Gypsy/DIRS1 | 6,617 | 6,523 | 6,635 | 7,375 |
| DNA/hAT | 11,827 | 11,652 | 11,240 | 11,157 |
| DNA/Tc1 | 2,576 | 2,606 | 2,635 | 1,689 |
| DNA/MULE-MuDR | 1,685 | 1,716 | 1,653 | 1,682 |
| DNA/PiggyBac | 2,968 | 2,965 | 2,591 | 2,289 |
| DNA/Tourist | 54 | 55 | 54 | 76 |

Supplementary table S2: Base pairs comprising transposable elements identified in the *Vespa* and *Vespula*.

| **Family Name** | ***Vespa mandarinia***  **Washington** | ***Vespa mandarinia***  **Canada** | ***Vespa crabro*** | ***Vespula* pensylvanica** |
| --- | --- | --- | --- | --- |
| SINEs | 1,512,551 | 1,514,326 | 1,448,699 | 1,302,610 |
| LINE/L1 | 1,929,147 | 1,949,957 | 849,829 | 1,713,103 |
| LINE/L2 | 54,791 | 40,462 | 35,187 | 11,839 |
| LINE/R1 | 4,267,095 | 5,453,491 | 6,853,553 | 278,927 |
| LINE/RTE | 169,184 | 191,009 | 487,222 | 11,328 |
| LTR/BEL/Pao | 62,859 | 78,556 | 76,909 | 91,772 |
| LTR/Ty1/Copia | 180,224 | 186,863 | 132,767 | 108,872 |
| LTR/Gypsy/DIRS1 | 2,323,465 | 2,259,712 | 1,797,812 | 850,254 |
| DNA/hAT | 1,279,150 | 1,262,060 | 1,059,923 | 971,359 |
| DNA/Tc1 | 984,989 | 976,938 | 1,000,928 | 581,013 |
| DNA/MULE-MuDR | 119,449 | 123,316 | 121,297 | 120,333 |
| DNA/PiggyBac | 1,442,745 | 1,484,895 | 752,551 | 787,257 |
| DNA/Tourist | 7,963 | 8,211 | 7,827 | 10,892 |

Supplementary table S3: Base pairs comprising transposable elements identified from insertion events the pangenomic graph relative to *Vespula*. Asterisks indicate genomes that were no produced in this study.

| **Family Name** | ***Vespa mandarinia***  **Washington** | | ***Vespa mandarinia***  **Canada**  **Primary** | ***Vespa mandarinia***  **Canada**  **Alternate** | ***Vespa crabro***  **US** | ***Vespa crabro***  **UK*** | ***Vespa Velutina**** |
| --- | --- | --- | --- | --- | --- | --- | --- |
| SINEs | | 10 | 9 | 9 | 13 | 13 | 9 |
| LINE/L1 | | 9 | 10 | 9 | 10 | 8 | 5 |
| LINE/L2 | | 0 | 0 | 0 | 3 | 3 | 1 |
| LINE/R1 | | 17 | 18 | 18 | 19 | 17 | 17 |
| LINE/RTE | | 0 | 0 | 0 | 1 | 1 | 1 |
| LTR/BEL/Pao | | 2 | 2 | 2 | 3 | 3 | 2 |
| LTR/Ty1/Copia | | 2 | 2 | 2 | 2 | 2 | 3 |
| LTR/Gypsy/DIRS1 | | 49 | 48 | 47 | 51 | 51 | 37 |
| DNA/hAT | | 34 | 37 | 37 | 35 | 33 | 34 |
| DNA/Tc1 | | 128 | 127 | 128 | 121 | 121 | 140 |
| DNA/MULE-MuDR | | 3 | 2 | 3 | 0 | 0 | 0 |
| DNA/PiggyBac | | 90 | 89 | 89 | 101 | 100 | 99 |
| DNA/Tourist | | 0 | 0 | 0 | 0 | 0 | 0 |

Supplementary table S4: Copy number of transposable elements identified from insertion events the pangenomic graph relative to *Vespula*. Asterisks indicate genomes that were no produced in this study.

| **Family Name** | ***Vespa mandarinia***  **Washington** | | ***Vespa mandarinia***  **Canada**  **Primary** | ***Vespa mandarinia***  **Canada**  **Alternate** | ***Vespa crabro***  **US** | ***Vespa crabro***  **UK*** | ***Vespa Velutina**** |
| --- | --- | --- | --- | --- | --- | --- | --- |
| SINEs | | 569 | 524 | 524 | 639 | 637 | 412 |
| LINE/L1 | | 691 | 764 | 753 | 873 | 739 | 494 |
| LINE/L2 | | 0 | 0 | 0 | 378 | 378 | 90 |
| LINE/R1 | | 1,113 | 1,129 | 1,153 | 983 | 941 | 1,013 |
| LINE/RTE | | 0 | 0 | 0 | 42 | 42 | 13 |
| LTR/BEL/Pao | | 1,363 | 1,363 | 1,363 | 1,694 | 1,694 | 1,009 |
| LTR/Ty1/Copia | | 118 | 118 | 118 | 172 | 172 | 218 |
| LTR/Gypsy/DIRS1 | | 11,525 | 11,524 | 11,467 | 12,540 | 12,964 | 10,882 |
| DNA/hAT | | 3,236 | 3,418 | 3,355 | 3,642 | 3,542 | 3,299 |
| DNA/Tc1 | | 27,595 | 27,551 | 27,563 | 23,005 | 23,006 | 25,866 |
| DNA/MULE-MuDR | | 164 | 132 | 164 | 0 | 0 | 0 |
| DNA/PiggyBac | | 15,123 | 15,108 | 15,108 | 16,080 | 16,090 | 15,257 |
| DNA/Tourist | | 0 | 0 | 0 | 0 | 0 | 0 |

Supplementary table S5: Mitochondrial genome assembly variants.

| **VNTR variant** | **Length (base pairs)** | **Coverage** | **Relative abundance** |
| --- | --- | --- | --- |
| 5 | 20,009 | 160x | 5% |
| 6 | 20,831 | 1800x | 54% |
| 7 | 21,654 | 850x | 25% |
| 8 | 22,474 | 500x | 15% |
| 9 | 23,300 | 30x | 1% |
